# Supplementary material for: Rewiring E2F1 with classical NHEJ via APLF suppression promotes bladder cancer invasiveness
Source: PubMed Central journal article supplement (PMC6615232; doi:10.1186/s13046-019-1286-9), 2019-07-08
Supplement: 13046_2019_1286_MOESM2_ESM.pdf [file 13046_2019_1286_MOESM2_ESM.pdf]

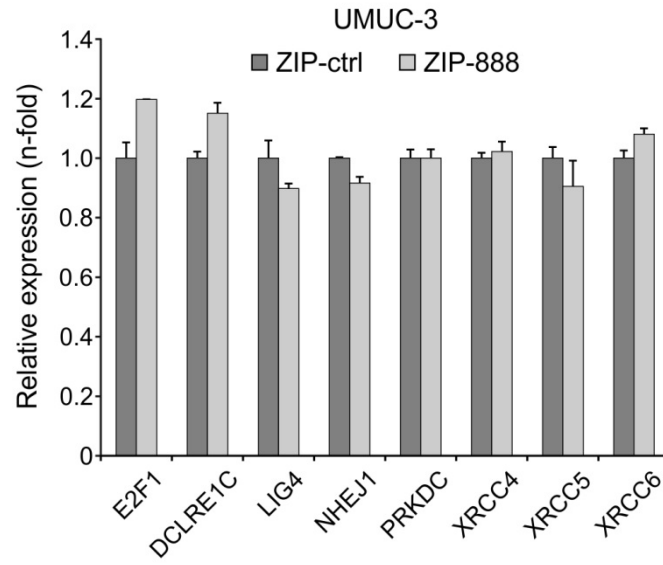

**Fig. S1** Quantification of mRNA levels in UMUC-3.ZIP.888. QPCR of E2F1, DCLRE1C, LIG4, PRKDC, XRCC4, XRCC5, XRCC6 in UMUC-3 ZIP-888 clone versus control.
