# Supplementary material for: Rewiring E2F1 with classical NHEJ via APLF suppression promotes bladder cancer invasiveness
Source: PubMed Central journal article supplement (PMC6615232; doi:10.1186/s13046-019-1286-9), 2019-07-08
Supplement: 13046_2019_1286_MOESM3_ESM.pdf [file 13046_2019_1286_MOESM3_ESM.pdf]

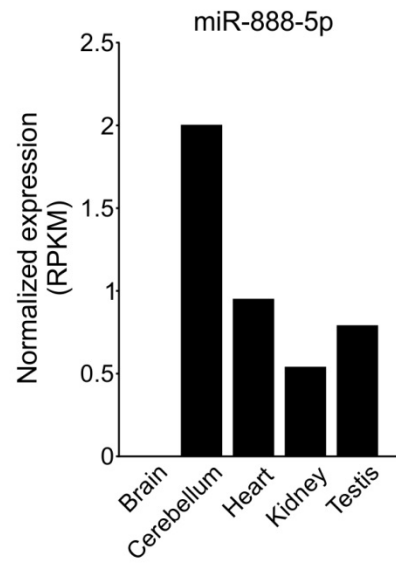

**Fig. S2** Expression levels of miR-888-5p across several normal tissues. Data were obtained from MiRIAD database.
