# Supplementary material for: Rewiring E2F1 with classical NHEJ via APLF suppression promotes bladder cancer invasiveness
Source: PubMed Central journal article supplement (PMC6615232; doi:10.1186/s13046-019-1286-9), 2019-07-08
Supplement: 13046_2019_1286_MOESM4_ESM.pdf [file 13046_2019_1286_MOESM4_ESM.pdf]

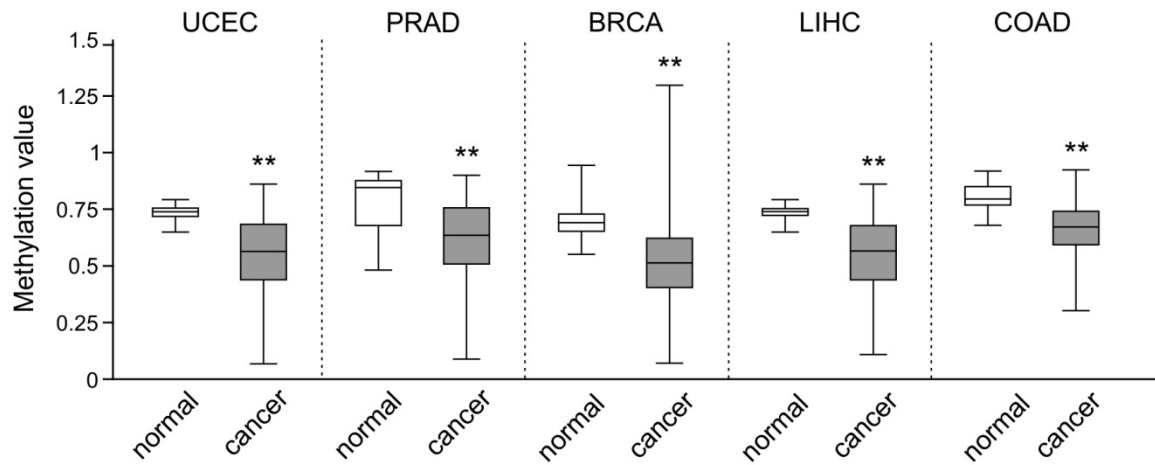

**Fig. S3** Methylation status of the MIR888 promoter. Analysis of the promoter region ranging 2000 bps upstream of the transcription start site in tumor types with reported overexpression of miR-888-5p (\*\*  $p < 0.01$ ). UCEC: Uterine Corpus Endometrial Carcinoma, PRAD: Prostate adenocarcinoma, BRCA: Breast Invasive Carcinoma, and LIHC: Liver Hepatocellular Carcinoma. COAD: colon adenocarcinoma. (\*\*  $p < 0.01$ )
