# Supplementary material for: Rewiring E2F1 with classical NHEJ via APLF suppression promotes bladder cancer invasiveness
Source: PubMed Central journal article supplement (PMC6615232; doi:10.1186/s13046-019-1286-9), 2019-07-08
Supplement: 13046_2019_1286_MOESM7_ESM.pdf [file 13046_2019_1286_MOESM7_ESM.pdf]

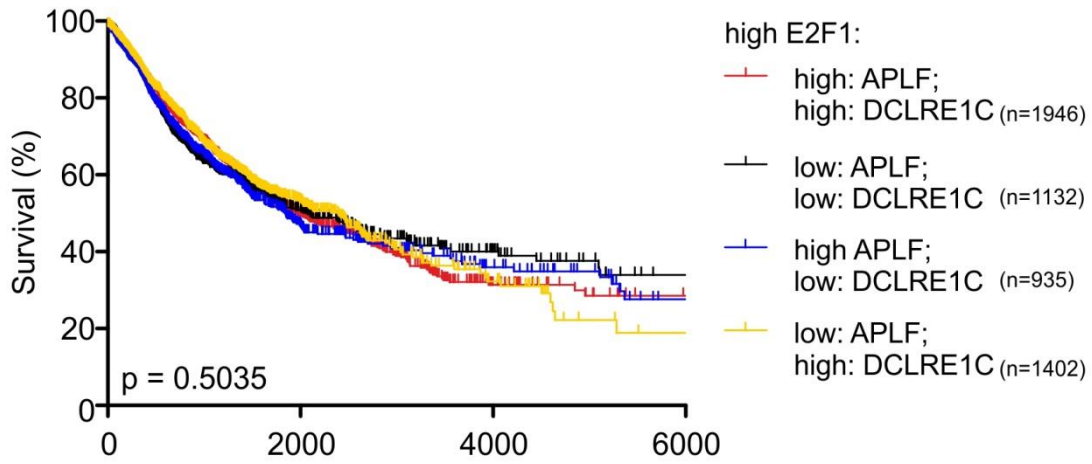

**Fig. S6** OS of PAN Cancer cohort patients with a 'high E2F1/high APLF/high DCLRE1C' tumor signature (red) versus patients without this signature. There is no significant change in survival probability relative to 'high E2F1/low APLF/low DCLRE1C' (black), 'high E2F1/high APLF/low DCLRE1C' (blue), or 'high E2F1/low APLF/high DCLRE1C' (yellow) tumor signatures.
